# Supplementary material for: Intratumoral regulatory T cells from colon cancer patients comprise several activated effector populations
Source: PubMed Central journal article supplement (PMC8375143; doi:10.1186/s12865-021-00449-1), 2021-08-19
Supplement: 12865_2021_449_MOESM1_ESM.pdf [file 12865_2021_449_MOESM1_ESM.pdf]

**Supplementary table S1.** Characteristics of the colon cancer patients included in mass cytometry analyses.

| <b>ID</b> | <b>age</b> | <b>sex</b> | <b>tumor location</b> | <b>TNM stage</b> | <b>microsatellite status</b> |
|-----------|------------|------------|-----------------------|------------------|------------------------------|
| 433       | 75         | M          | caekum                | T3N0M0           | MSS                          |
| 435       | 80         | F          | caekum                | T2N0M0           | MSS                          |
| 441       | 44         | M          | transverse colon      | T3N1M0           | MSS                          |
| 442       | 83         | M          | sigmoid colon         | T3N2M0           | MSS                          |
| 443       | 57         | M          | descending colon      | T3N1M0           | MSS                          |
| 444       | 94         | M          | caekum                | T3N1M0           | MSS                          |
| 445       | 60         | M          | sigmoid colon         | T4N0M1           | MSS                          |
| 448       | 88         | M          | transverse colon      | T2N0M0           | MSS                          |

**Supplementary Table S2.** Characteristics of the colon cancer patients included in the survival analysis.

|                       |                   | females | males |
|-----------------------|-------------------|---------|-------|
|                       | n                 | 22      | 22    |
|                       | age               | 62-87   | 46-93 |
| Tumor location        | right colon       | 20      | 12    |
|                       | left colon        | 2       | 9     |
|                       | several locations | -       | 1     |
| stage                 | I                 | 2       | 2     |
|                       | II                | 10      | 9     |
|                       | III               | 10      | 11    |
|                       | IV                | -       | -     |
| Microsatellite status | MSS               | 14      | 20    |
|                       | MSI-H             | 8       | 2     |

**Supplementary Table S3.** List of antibodies used in mass cytometry experiments

| <b>metal/fluorescence tag</b> | <b>target</b>                               | <b>clone</b> | <b>manufacturer</b>   |
|-------------------------------|---------------------------------------------|--------------|-----------------------|
| 143Nd                         | CD352 (NTB-A)                               | NT-7         | Fluidigm              |
| 144Nd                         | CD69                                        | FN50         | Fluidigm              |
| 148Nd                         | CD278/ICOS                                  | C398.4A      | Fluidigm              |
| 149Sm                         | CD127 (IL-7Ra)                              | A019D5       | Fluidigm              |
| 150Nd                         | CD223/LAG-3                                 | 11C3C65      | Fluidigm              |
| 151Eu                         | CD103                                       | Ber-ACT8     | Fluidigm              |
| 152Sm                         | TCR $\gamma\delta$                          | 11F2         | Fluidigm              |
| 153Eu                         | TCR V $\alpha$ 7.2 (MAIT cell)              | 3C10         | Fluidigm              |
| 155Gd                         | CD45RA                                      | HI100        | Fluidigm              |
| 158Gd                         | CD137/4-1BB                                 | 4B4-1        | Fluidigm              |
| 159Tb                         | CD337 (NKp30)                               | Z25          | Fluidigm              |
| 160Gd                         | CD28                                        | CD28.2       | Fluidigm              |
| 164Dy                         | CD95/Fas                                    | DX2          | Fluidigm              |
| 165Ho                         | CD45RO                                      | UCHL1        | Fluidigm              |
| 166Er                         | CD314 (NKG2D)                               | ON72         | Fluidigm              |
| 167Er                         | CD158e1 (KIR3DL1, NKB1)                     | DX9          | Fluidigm              |
| 169Tm                         | CD159a (NKG2A)                              | Z199         | Fluidigm              |
| 170Er                         | TCR V $\alpha$ 24-J $\alpha$ 18 (iNKT cell) | 6B11         | Fluidigm              |
| 171Yb                         | CD66a/CEACAM1                               | CD66a-B1.1   | Fluidigm              |
| 172Yb                         | CD38                                        | HIT2         | Fluidigm              |
| 173Yb                         | CD158b (KIR2DL2/L3, NKAT2)                  | DX27         | Fluidigm              |
| 174Yb                         | CD94                                        | HP-3D9       | Fluidigm              |
| 175Lu                         | CD279 (PD-1)                                | EH12.2H7     | Fluidigm              |
| 176Yb                         | CD56 (NCAM)                                 | NCAM16.2     | Fluidigm              |
| 209Bi                         | CD16                                        | 3G8          | Fluidigm              |
| 156Gd                         | PE (Fluorochrome)                           | PE001        | Fluidigm              |
| 163Dy                         | APC (Fluorochrome)                          | APC003       | Fluidigm              |
| 162Dy                         | FoxP3                                       | 259D/C7      | Fluidigm              |
| 168Er                         | Ki-67                                       | B56          | Fluidigm              |
| 106 Cd                        | CD86                                        | IT2.2        | Biolegend, self-conj. |
| 110 Cd                        | V $\delta$ 2                                | B6           | Biolegend, self-conj. |
| 111 Cd                        | CD62L                                       | DREG-56      | Biolegend, self-conj. |
| 113 Cd                        | CD3                                         | SK7          | Biolegend, self-conj. |
| 116 Cd                        | CD8 $\alpha$                                | RPA-T8       | Biolegend, self-conj. |
| 161Dy                         | TIGIT                                       | MBSA43       | Biolegend, self-conj. |
| 145Nd                         | CD39                                        | A1           | Biolegend, self-conj. |
| 146Nd                         | CD84                                        | CD84.1.21    | Biolegend, self-conj. |
| 147Sm                         | CD134 (OX-40)                               | ACT35        | Biolegend, self-conj. |
| 141Pr                         | CD25 (IL-2R)                                | 2A3          | Biolegend, self-conj. |
| 142Nd                         | CD161                                       | HP-3G10      | Biolegend, self-conj. |
| Cd112                         | FITC (Fluorochrome)                         | FIT-22       | Biolegend, self-conj. |
| Pt194,Pt196,Pt198             | CD45                                        | HI30         | Biolegend, self-conj. |

**Supplementary table S4.** Antibodies used for flow cytometry analyses

| <b>marker</b> | <b>Ab clone</b> | <b>fluorochrome</b> | <b>distributer</b> |
|---------------|-----------------|---------------------|--------------------|
| CD3           | UCHT1           | AF700               | BioLegend          |
| CD4           | OKT4            | PerCP               | BioLegend          |
| CD8           | RPA-T8          | BV711               | BD Biosciences     |
| CD25          | M-A251          | BV650               | BD Biosciences     |
| CD39          | A1              | FITC                | AbD Serotec        |
| Foxp3         | PCH101          | APC                 | eBioscience        |

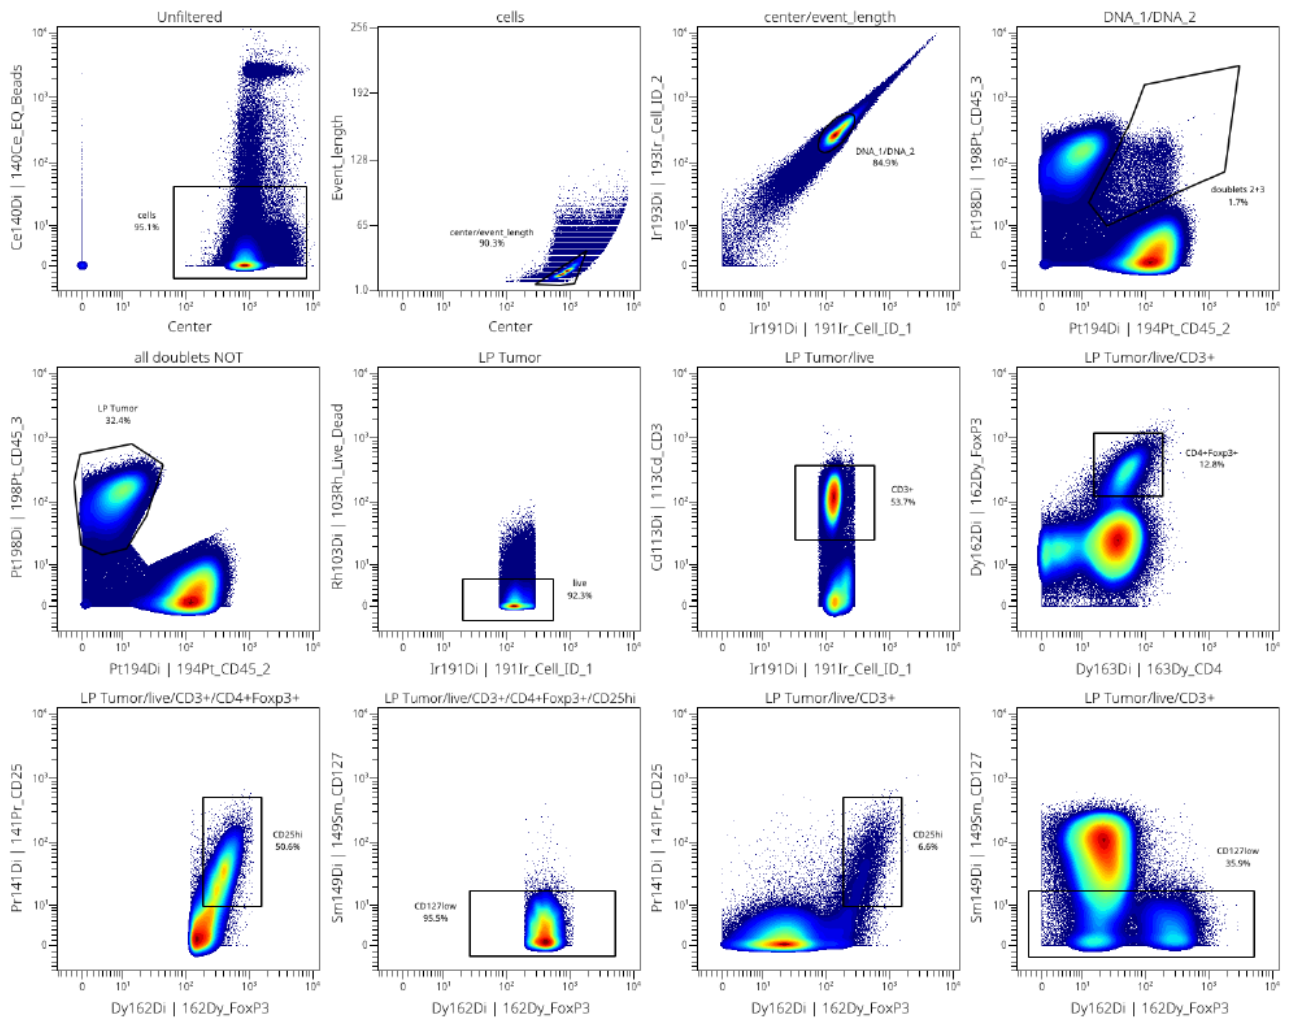

**Supplementary Figure S1.** Representative gating strategy for mass cytometry experiments. Gating strategy shows the clean-up (doublet gating is an example of all possible combinations of the four bar codes), de-barcoding and gating of  $CD3^+CD4^+Foxp3^+CD25^{hi}CD127^{low}$  Treg for further analysis. The last two plots show the same gates for  $Foxp3^+CD25^{hi}$  cells and  $CD127^{low}$  cells among all  $CD3^+$  cells in a representative tumor sample for comparison purposes

# Suppl. Fig. S2

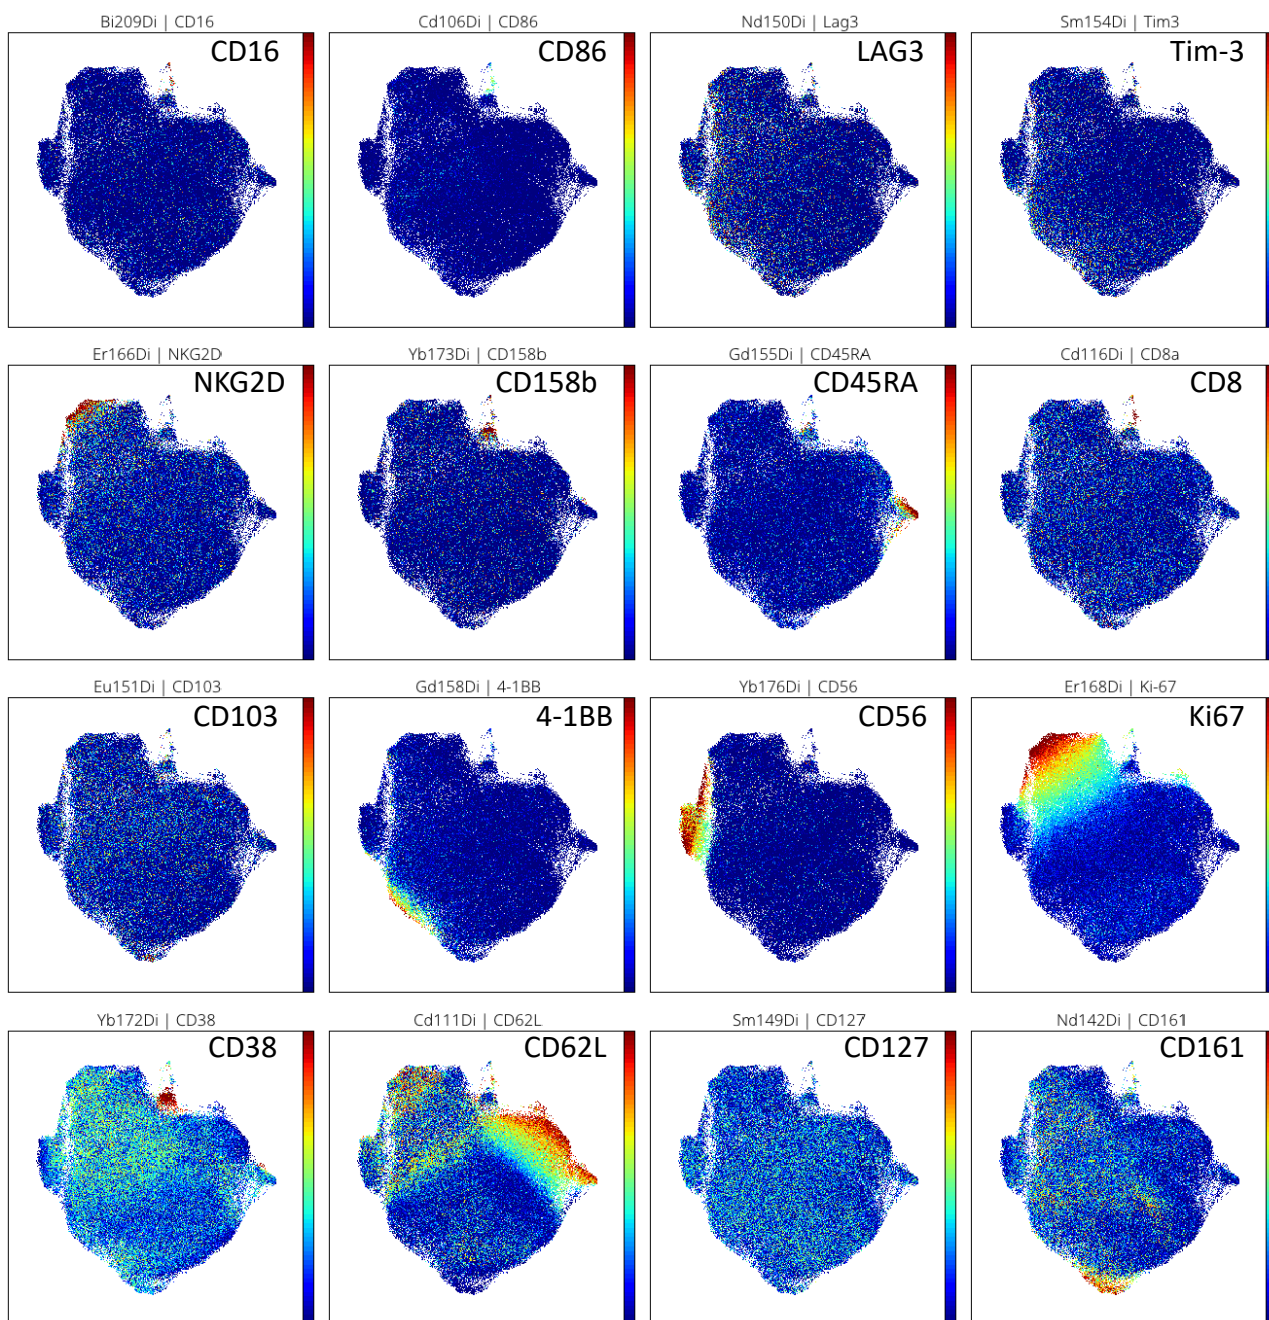

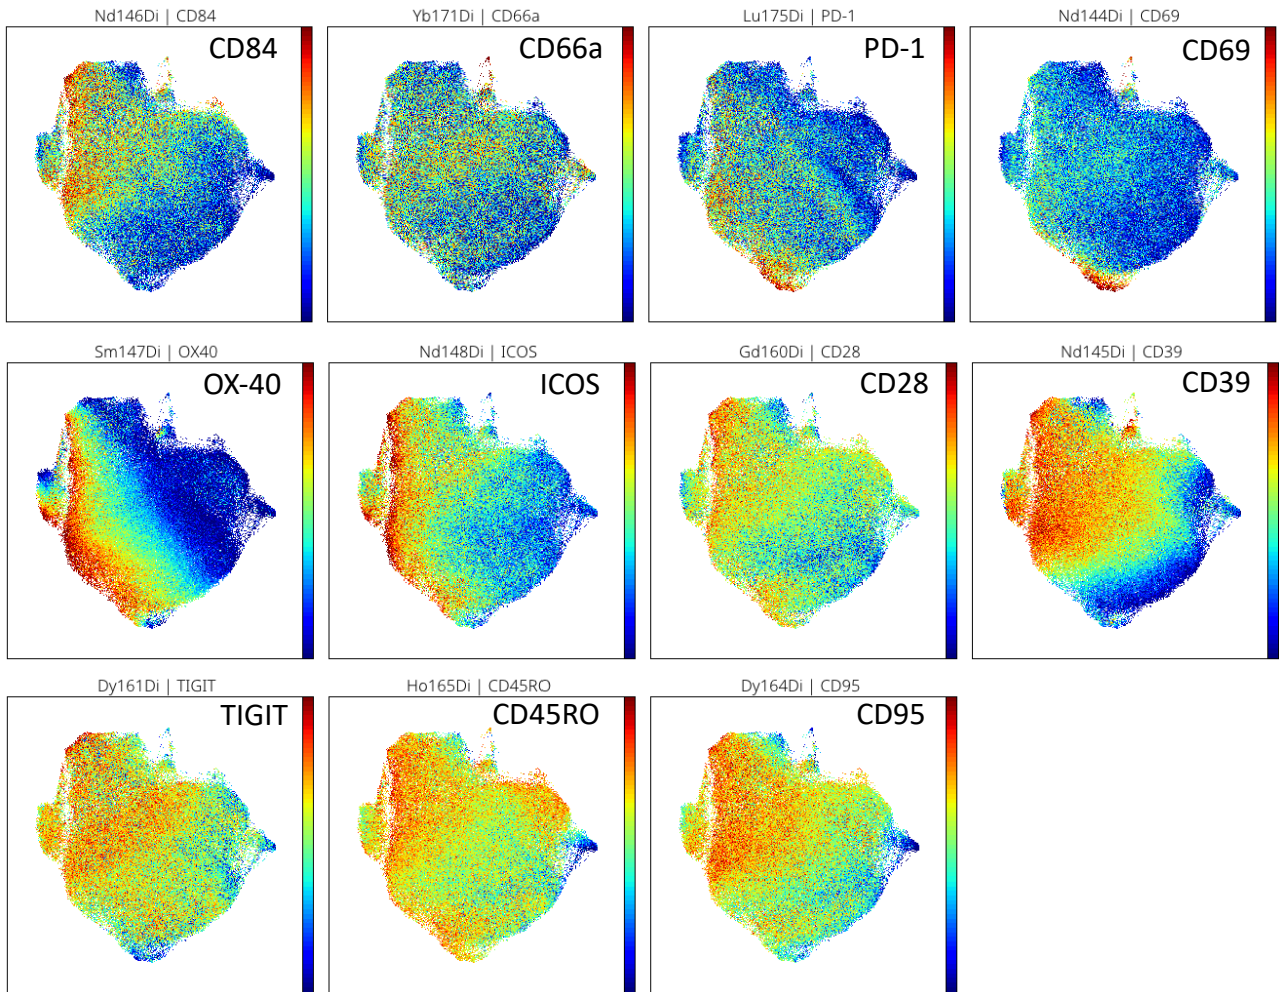

**Supplementary Figure S2.** Expression of individual molecules (indicated in the upper right corner of each panel) is visualized on the UMAP plot. Colour shows intensity of marker expression going from blue (low) to red (high).

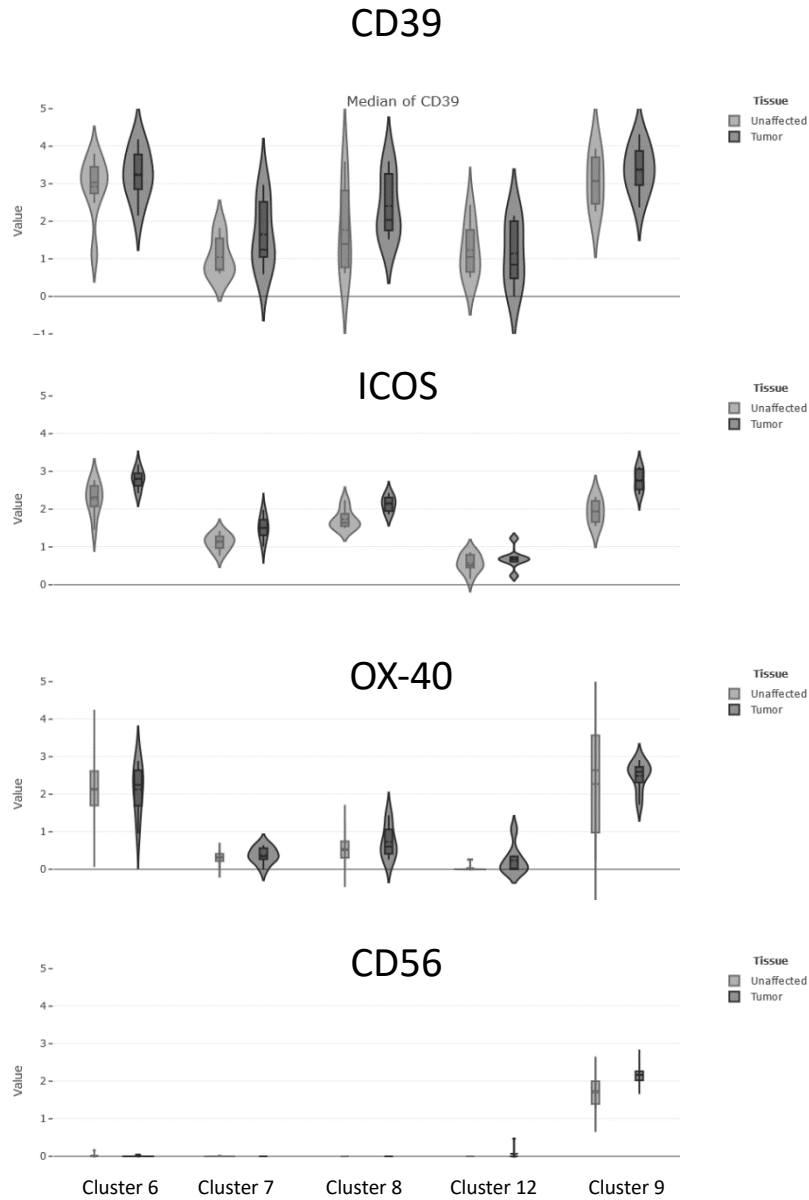

**Supplementary Figure S3.** Violin plots of median expression of CD39, ICOS, OX-40 and CD56 for Phenograph clusters in unaffected and tumor tissue. Shown are clusters with a p-value  $>0.02$  (Wilcoxon test). Cluster 9 does not contain any cells in 4 (of 8) samples in the unaffected tissue and therefore shows a large spread in the violin plot.



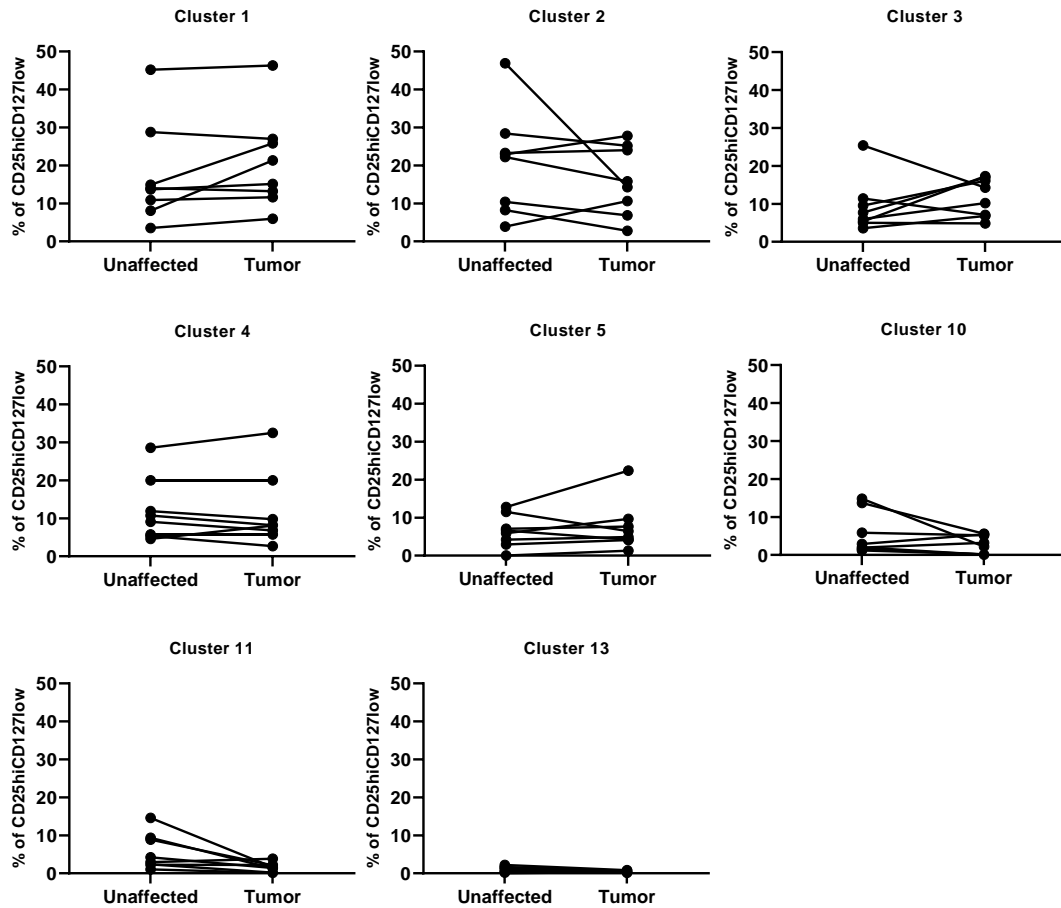

**Supplementary Figure S4.** Paired analysis of Phenograph cluster frequencies of FoxP3<sup>+</sup> CD25<sup>hi</sup> CD127<sup>low</sup> Treg in unaffected and tumor tissue. Symbols represent individual values and unaffected tissue and tumor from the same patients are connected. Clusters with a p value >0.02 (Wilcoxon test) are shown.

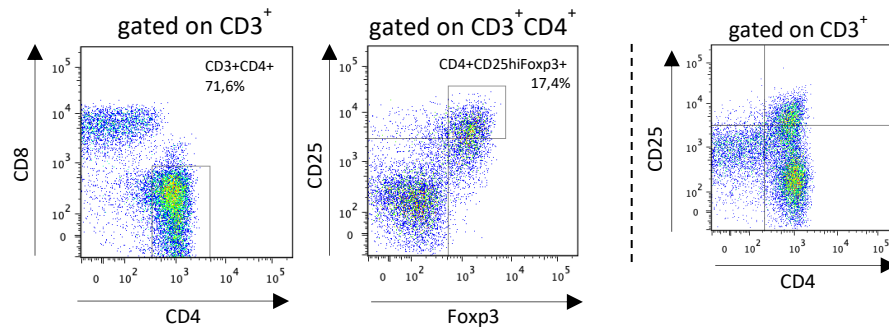

**Supplementary Figure S5.** Gating strategy for identification of Treg. Single cell suspensions were isolated from blood and colon tissues, stained and analyzed by flow cytometry. The dot-plots illustrate the gating strategy to identify CD3<sup>+</sup>CD4<sup>+</sup>CD25<sup>hi</sup>Fcpx3<sup>+</sup> Treg in a colon tumor sample. Fcpx3 expression was determined using an isotype control and a dot-plot to aid for gate placement (to the far right) was used to identify CD25<sup>high</sup> cells.

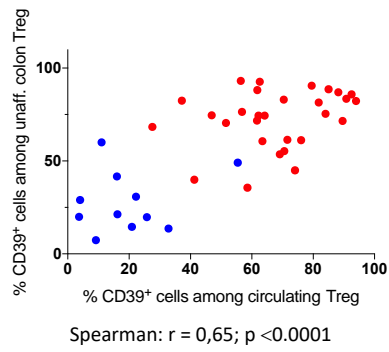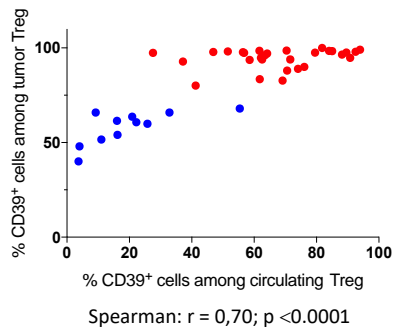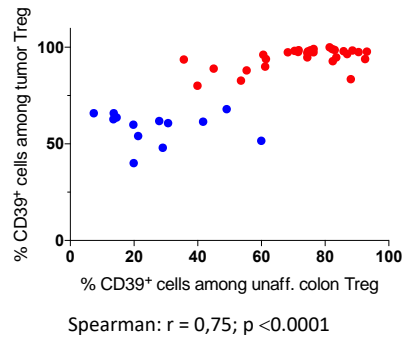

**Supplementary Figure S6.** Correlation between CD39 expression by Treg in different tissues. Colon tumors were divided into group I and II tumors based on CD39 expression by isolated intratumoral Treg in flow cytometry analysis. Correlation between frequencies of CD39<sup>+</sup> Treg among total Treg in peripheral blood, unaffected colon tissue and tumor tissue was analyzed using Spearman rank correlation. Symbols represent individual values ( $n = 40-43$ ) and data is color-coded in red (group I) and blue (group II).
